# Supplementary material
Source: PubMed Central journal article supplement (PMC3422476)

# Supplementary Figure 1

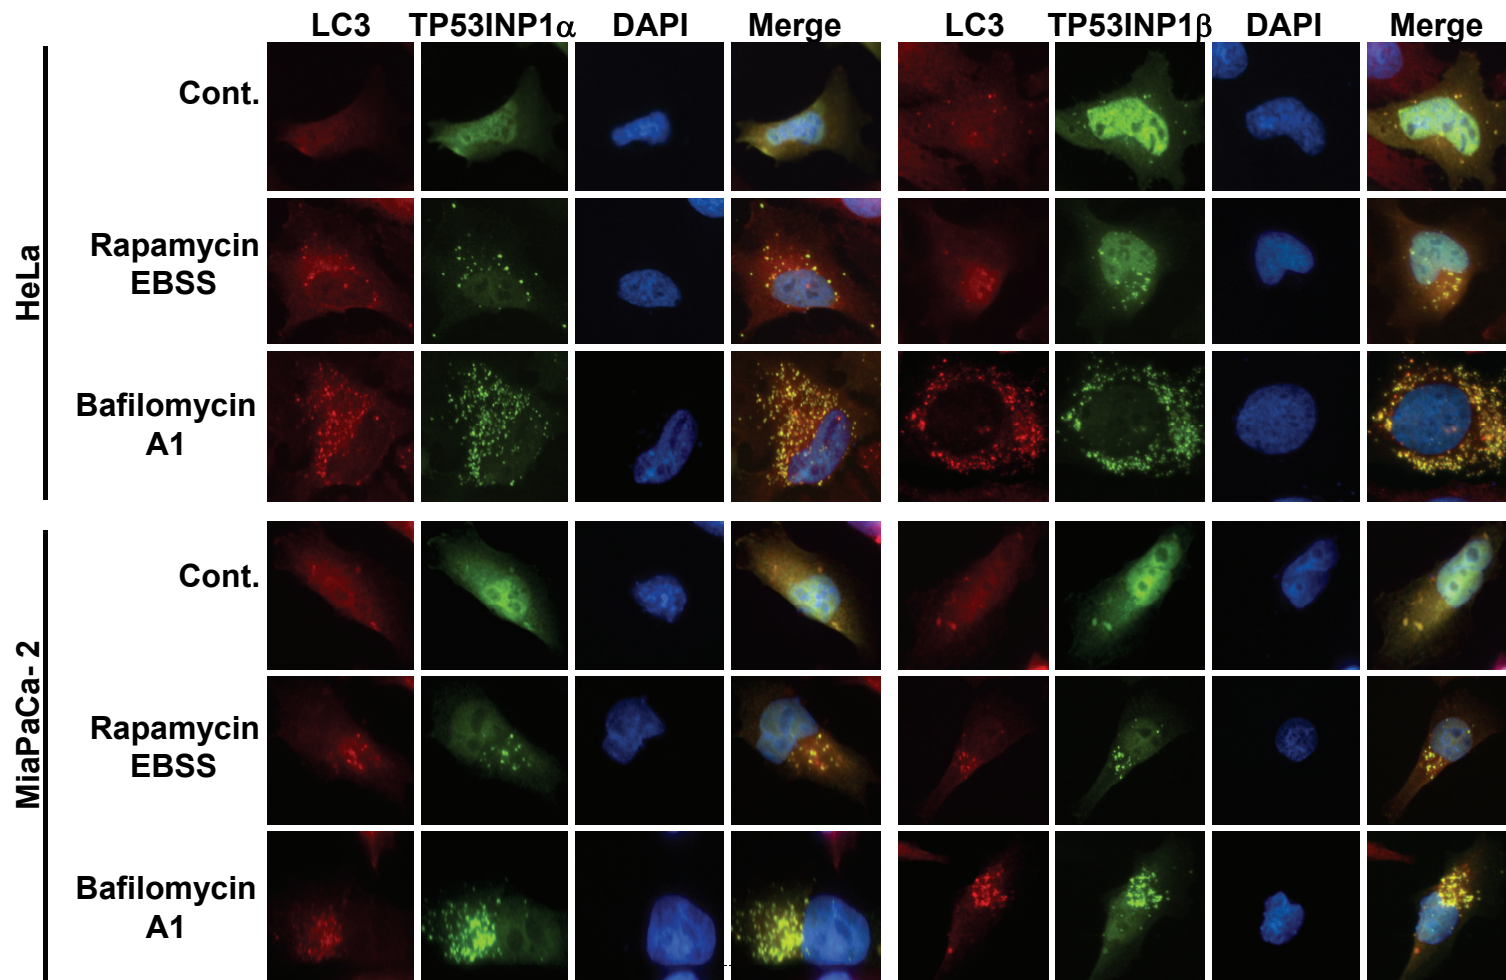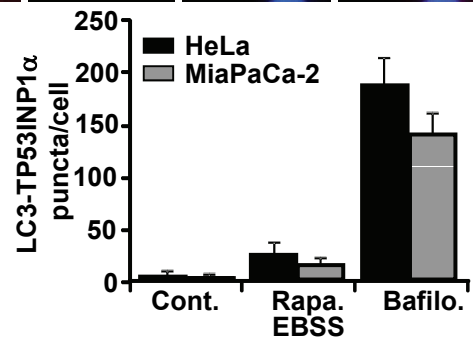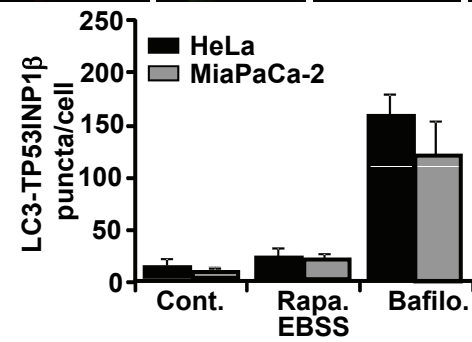

Supplement: cdd201230x1.pdf [file cdd201230x1.pdf]

## Supplementary Figure 2

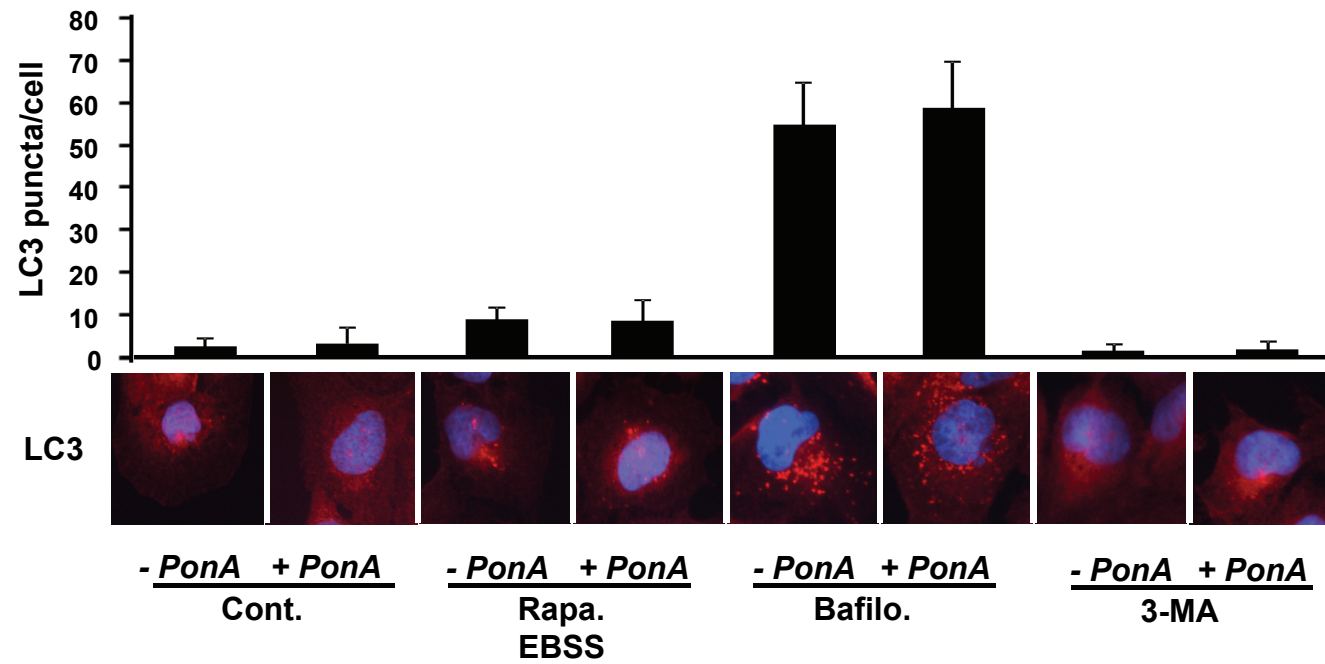

Supplement: cdd201230x2.pdf [file cdd201230x2.pdf]

# Supplementary Figure 3

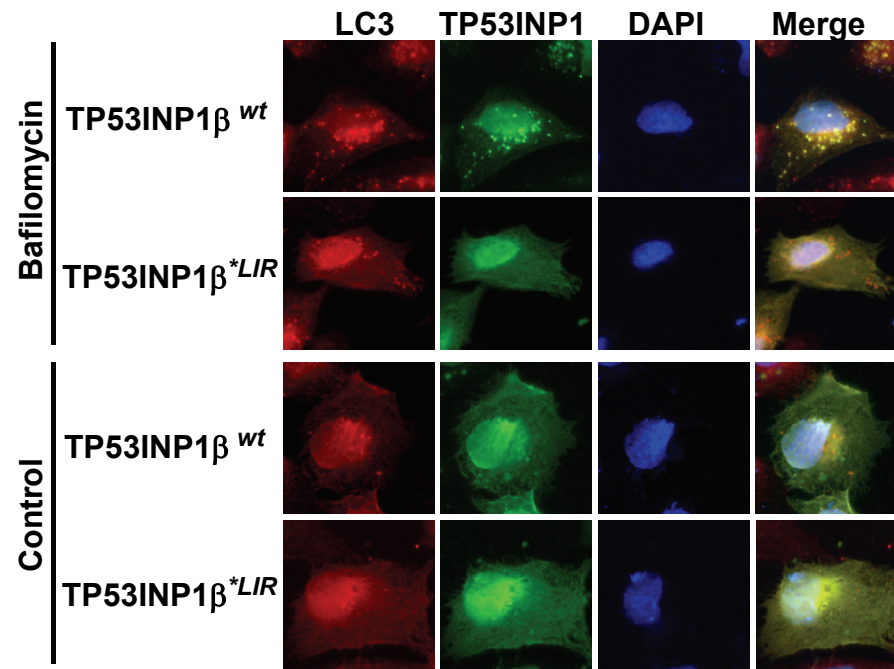

Supplement: cdd201230x3.pdf [file cdd201230x3.pdf]

# Supplementary Figure 4

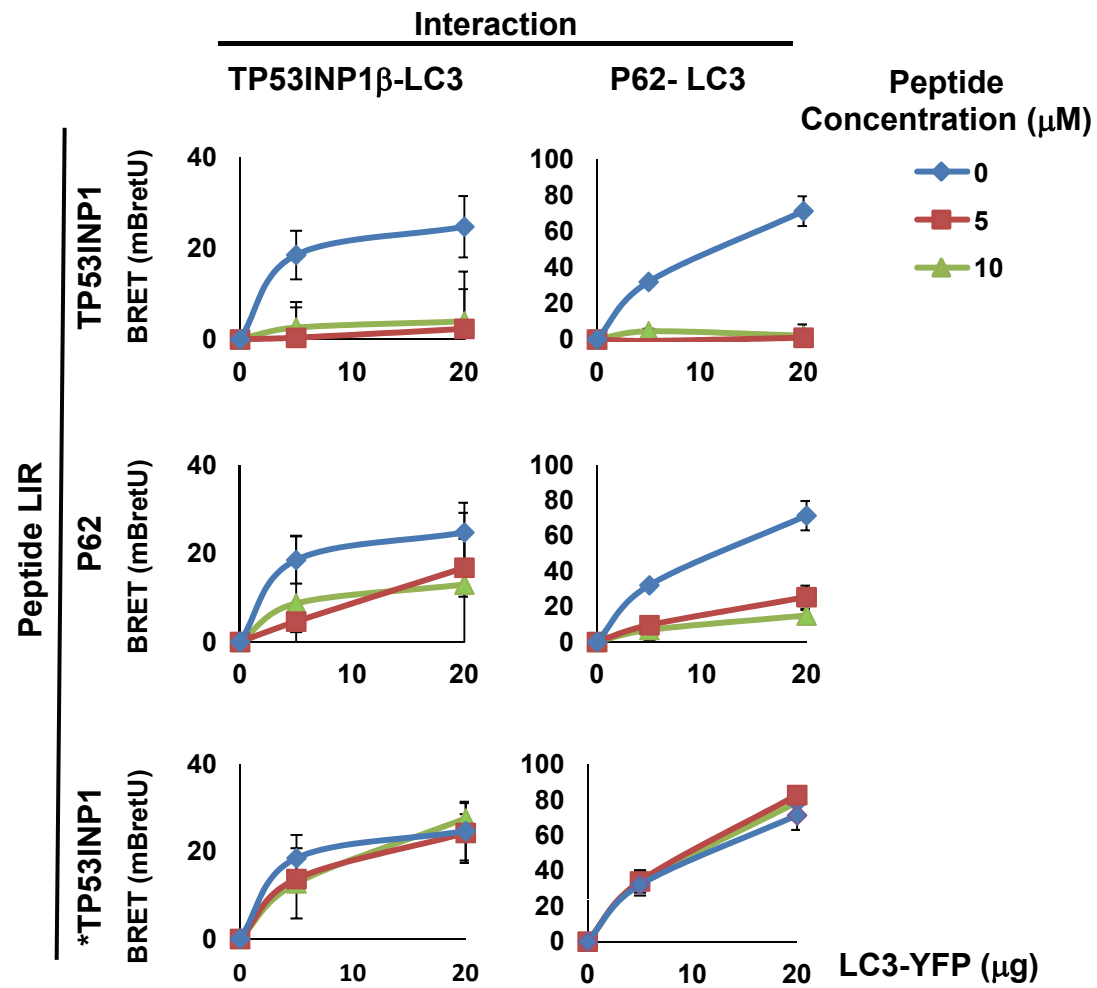

Supplement: cdd201230x4.pdf [file cdd201230x4.pdf]

# Supplementary Figure 5

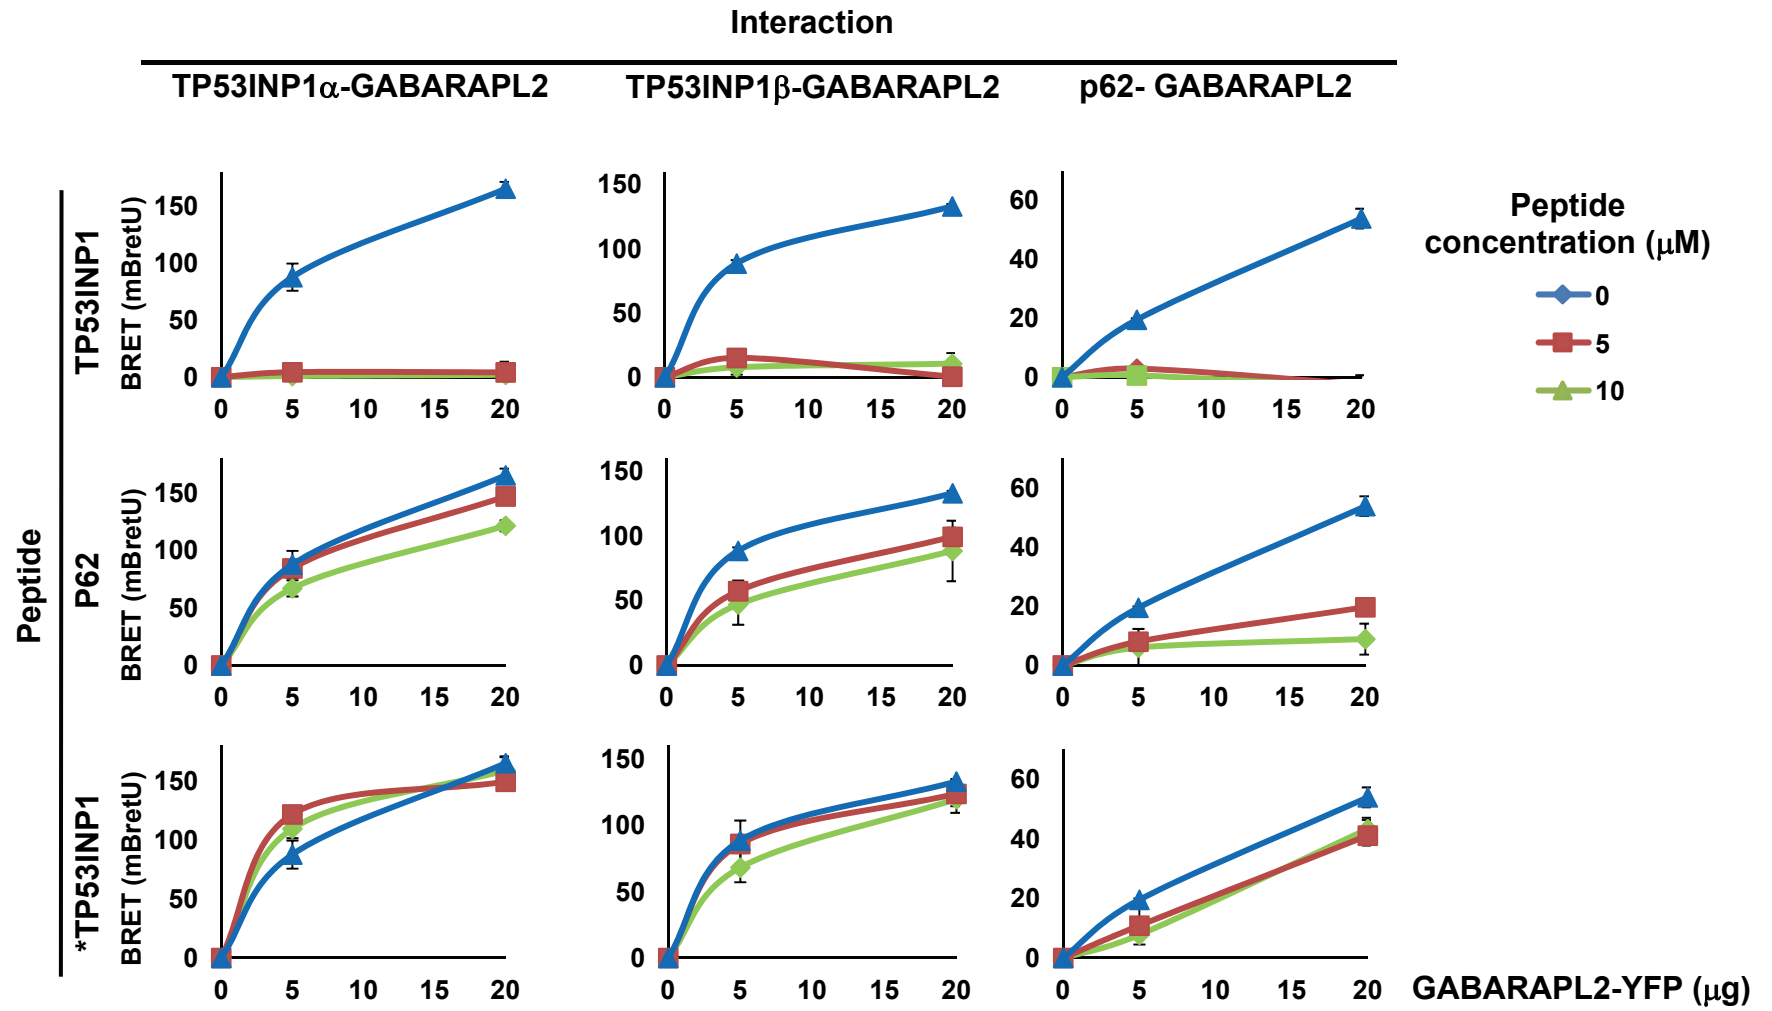

Supplement: cdd201230x5.pdf [file cdd201230x5.pdf]

## Supplementary Figure 6

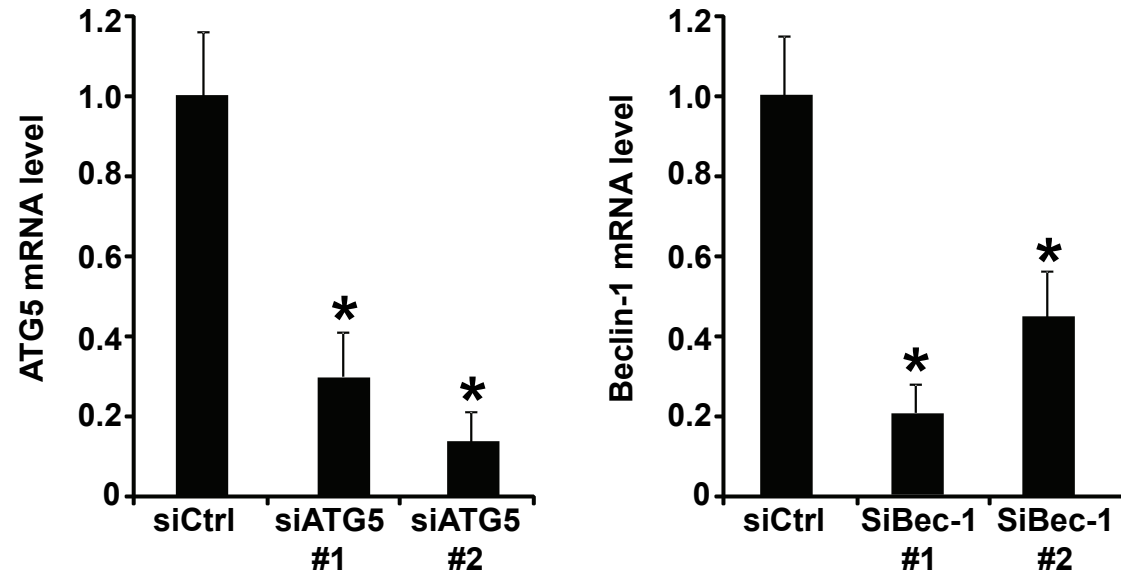

Supplement: cdd201230x6.pdf [file cdd201230x6.pdf]
